# Supplementary material for: Theoretical study on the charge transport in single crystals of TCNQ, F2-TCNQ and F4-TCNQ
Source: Royal Society of Chemistry journal article supplement (doi:10.1039/c7cp07189b), 2018-01-01
Supplement: c7cp07189b1.pdf [file c7cp07189b1.pdf]

## Electronic Supplementary Information:

### Theoretical Study on the Charge Transport in Single Crystals of TCNQ, F<sub>2</sub>-TCNQ and F<sub>4</sub>-TCNQ

Li-Fei Ji,<sup>a</sup> Jian-Xun Fan,<sup>a,b</sup> Shou-Feng Zhang,<sup>a</sup> Ai-Min Ren<sup>\*a</sup>

a: Laboratory of Theoretical and Computational Chemistry, Institute of Theoretical Chemistry, Jilin University, Changchun 130023, China

b: College of Chemistry and Material, Weinan Normal University, Weinan 714000, China

#### S1. Selection of functional and basis set

To test the reliability of the calculated results, a series of functionals including B3LYP, B3PW91, M06-2X,  $\omega$ B97XD and PBE1PBE with same basis set of 6-31+G(d,p) were employed to calculate the geometrical and electronic structures of F<sub>2</sub>-TCNQ. The optimized geometries of F<sub>2</sub>-TCNQ obtained from these functionals were compared with the configuration in crystal. As shown in Fig. S1, the discrepancies mainly about the bond lengths obtained from different functionals are small. The HOMO/LUMO energies, energy gaps, as well as electron reorganization energies for F<sub>2</sub>-TCNQ at different levels are listed in Table S1. The calculated results indicate that the frontier orbital distributions obtained from these five functionals show little difference. But it is found that M06-2X and  $\omega$ B97XD tend to underestimate the energy level of HOMO and overestimate the energy level of LUMO and energy gap; and the reorganization energies evaluated by these methods are much larger than other methods. While the results obtained by B3PW91, B3LYP, and PBE1PBE methods are close to each other. Unfortunately, there is no experimental LUMO values for compounds F<sub>n</sub>-TCNQ (n = 0, 2, 4) for reference. But B3LYP has been proven suitable to describe the geometric relaxation of charge transfer process for various organic systems so far. So B3LYP functional was selected out for geometry optimizations and frequency calculations in this study. Furthermore, in order to investigate the influence of basis set, different basis 6-31G(d,p), 6-31+G(d,p), and 6-311+G(d,p) using B3LYP functional were also employed to optimize the molecular geometries of F<sub>2</sub>-TCNQ. As shown in Fig. 1, the equilibrium geometries of F<sub>2</sub>-TCNQ

obtained at B3LYP/6-311+G(d,p) are closest to the configuration in crystal. The HOMO/LUMO energies and energy gaps of F<sub>2</sub>-TCNQ at different levels are listed in Table S2. It can be seen that the basis sets without diffusion functions overestimate the energy level of frontier orbital, but the effect of the diffusion functions on reorganization energy is negligible. So the B3LYP/6-311+G(d,p) was employed to characterize the electronic properties of the complexes in this work.

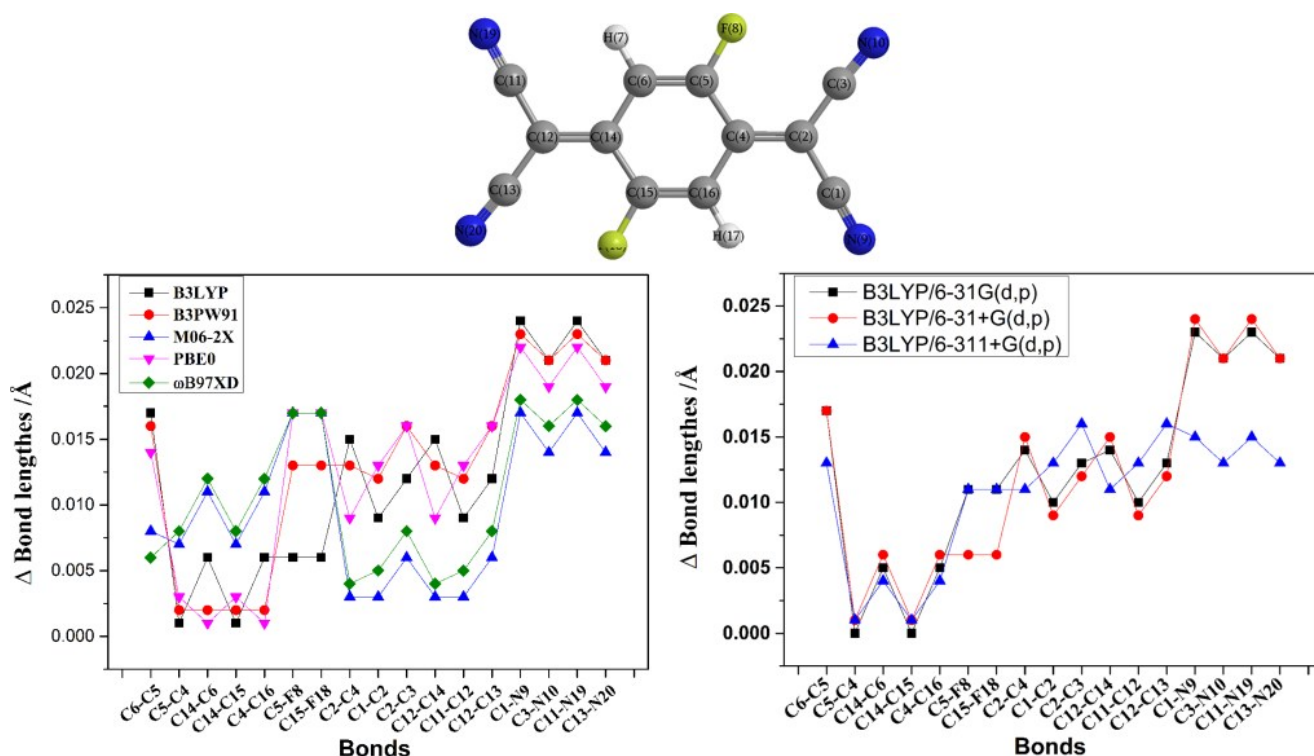

Fig. S1 the optimized bond lengths of F<sub>2</sub>-TCNQ compared with to the configuration in crystal employing different functionals M06-2X, ωB97XD, B3PW91, B3LYP, and PBE1PBE with the same 6-31+G(d,p) basis set (left) and B3LYP with different basis sets (right). The atom indices are labeled on the molecular structures.

Table S1. Calculated HOMO/LUMO energies ( $E_{\text{HOMO}}/E_{\text{LUMO}}$ , in eV), energy gaps ( $E_g$ , in eV), and electron reorganization energies ( $\lambda_e$ , in meV) for F<sub>2</sub>-TCNQ by different functional coupled with the same basis set 6-31+G(d,p).

| F <sub>2</sub> -TCNQ | M06-2X | ωB97XD | B3PW91 | B3LYP | PBE1PBE |
|----------------------|--------|--------|--------|-------|---------|
| $\lambda_e$          | 383    | 405    | 263    | 267   | 282     |
| HOMO                 | -8.97  | -9.55  | -7.87  | -7.84 | -8.01   |
| LUMO                 | -4.55  | -3.79  | -5.42  | -5.38 | -5.27   |
| $E_g$                | 4.42   | 5.76   | 2.45   | 2.46  | 2.74    |

Table S2. Calculated HOMO/LUMO energies ( $E_{\text{HOMO}}/E_{\text{LUMO}}$ , in eV), energy gaps ( $E_g$ , in eV), and electron reorganization energies ( $\lambda_e$ , in meV) for F<sub>2</sub>-TCNQ by B3LYP with different basis sets.

| F <sub>2</sub> -TCNQ | B3LYP/6-31G(d,p) | B3LYP/6-31+G(d,p) | B3LYP/6-311+G(d,p) |
|----------------------|------------------|-------------------|--------------------|
| $\lambda_e$          | 262.9            | 267.2             | 278.5              |
| HOMO                 | -7.49            | -7.84             | -7.91              |
| LUMO                 | -5.03            | -5.38             | -5.41              |
| $E_g$                | 2.46             | 2.46              | 2.50               |

Table S3. Calculated LUMO energies, adiabatic electron affinities [EA(a)] and electron reorganization energy ( $\lambda_e$ ) at B3LYP/6-311+G(d,p) level for TCNQ, F<sub>2</sub>-TCNQ and F<sub>4</sub>-TCNQ compounds. (in eV)

| Compounds        | TCNQ  | F <sub>2</sub> -TCNQ | F <sub>4</sub> -TCNQ |
|------------------|-------|----------------------|----------------------|
| LUMO             | -5.15 | -5.41                | -5.65                |
| EA(a)            | 3.75  | 4.03                 | 4.28                 |
| $\lambda_e$ (NM) | 0.268 | 0.279                | 0.270                |
| $\lambda_e$ (AP) | 0.266 | 0.277                | 0.272                |

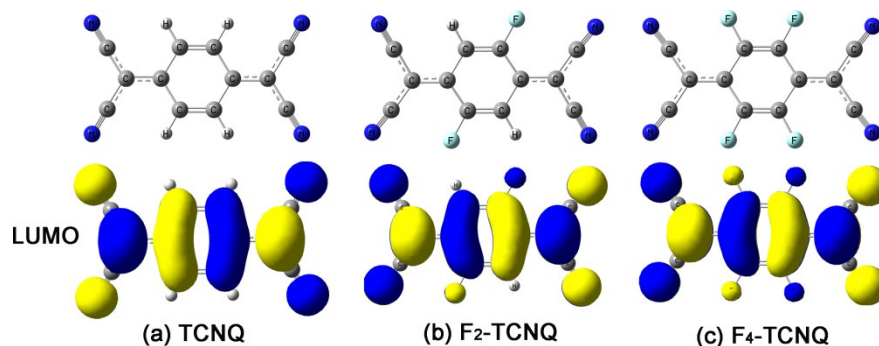

Figure S2. The optimized molecular structures and distribution of LUMO orbitals for TCNQ, F<sub>2</sub>-TCNQ and F<sub>4</sub>-TCNQ molecules at B3LYP/6-311+G(d,p) level.

Table S4. Lattice constants of bulk single crystalline TCNQ, F<sub>2</sub>-TCNQ and F<sub>4</sub>-TCNQ. (a: the ref.14)

|                 | TCNQ <sup>a</sup> | F <sub>2</sub> -TCNQ <sup>a</sup> | F <sub>4</sub> -TCNQ <sup>a</sup> |
|-----------------|-------------------|-----------------------------------|-----------------------------------|
| a (Å)           | 8.883             | 10.196                            | 9.246                             |
| b (Å)           | 6.594             | 5.923                             | 8.096                             |
| c (Å)           | 16.395            | 8.836                             | 14.612                            |
| $\alpha$ (deg)  | 90.000            | 90.000                            | 90.000                            |
| $\beta$ (deg)   | 98.351            | 106.829                           | 90.000                            |
| $\gamma$ (deg)  | 90.000            | 90.000                            | 90.000                            |
| Space groups    | C2/c              | C2/m                              | Pbca                              |
| Temperature (K) | 180               | 180                               | 180                               |

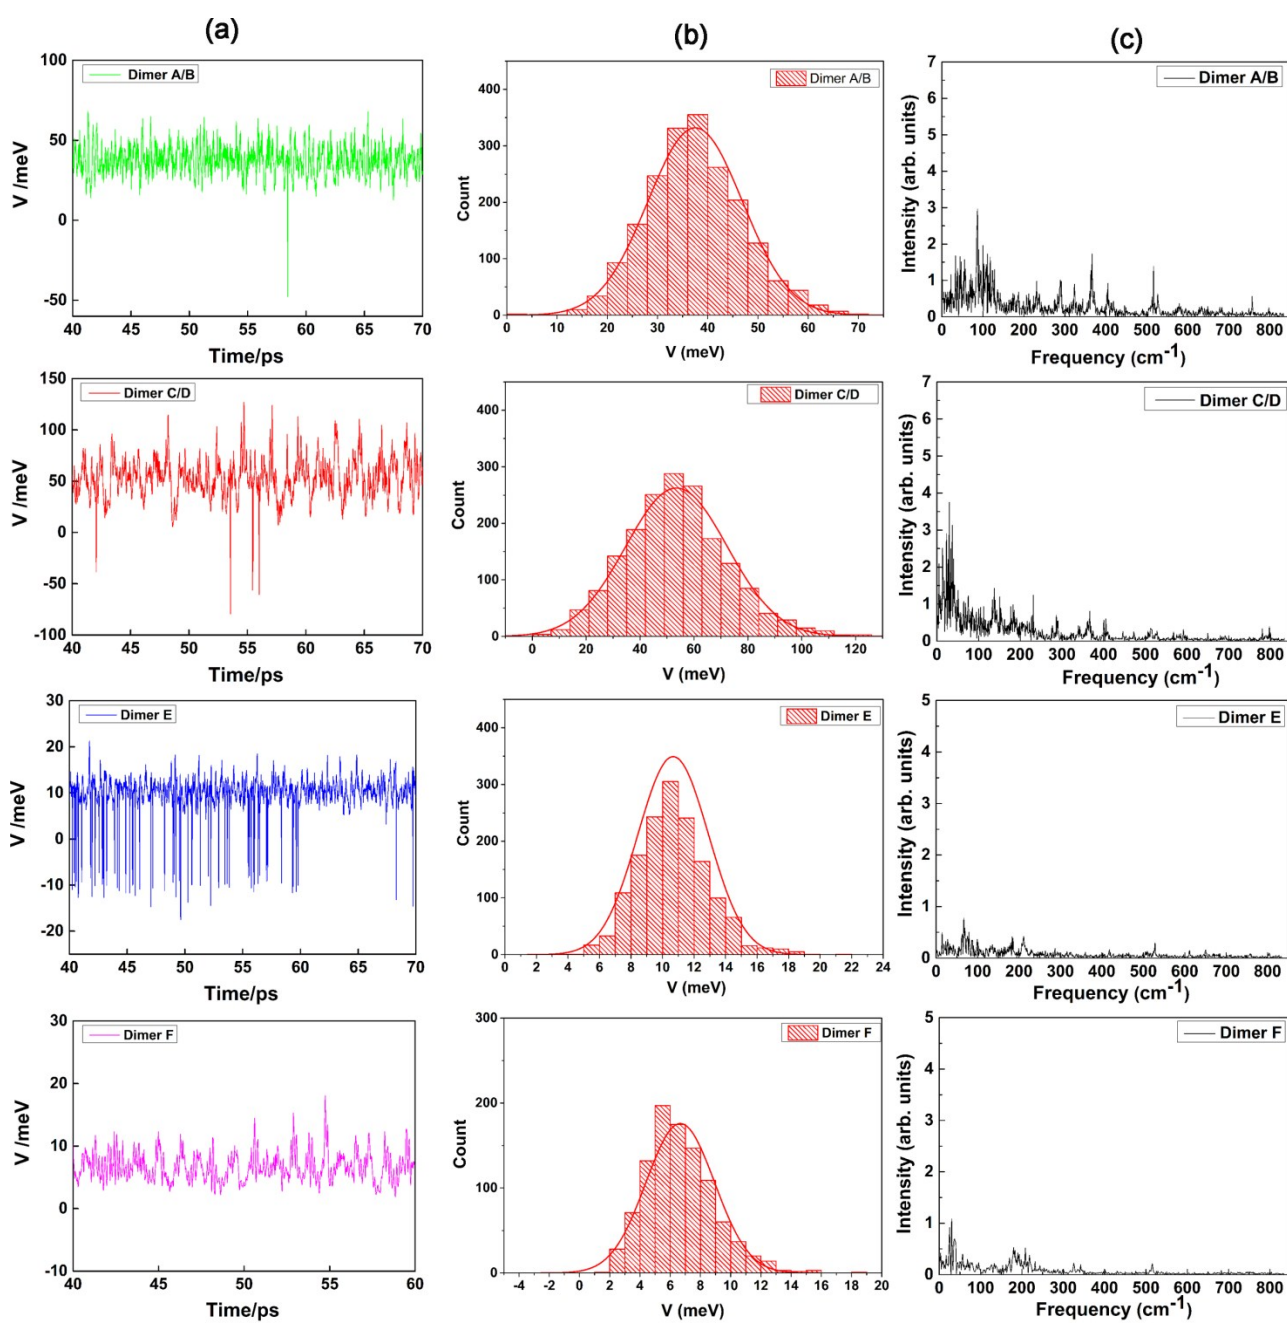

Figure S3. (a) Evolution of transfer integrals with sampling time at 300K, (b) Gaussian fitting of the transfer integrals, and (c) the contributions of vibration modes to the transfer integral fluctuation for all the transport pathways in  $F_2$ -TCNQ crystal.

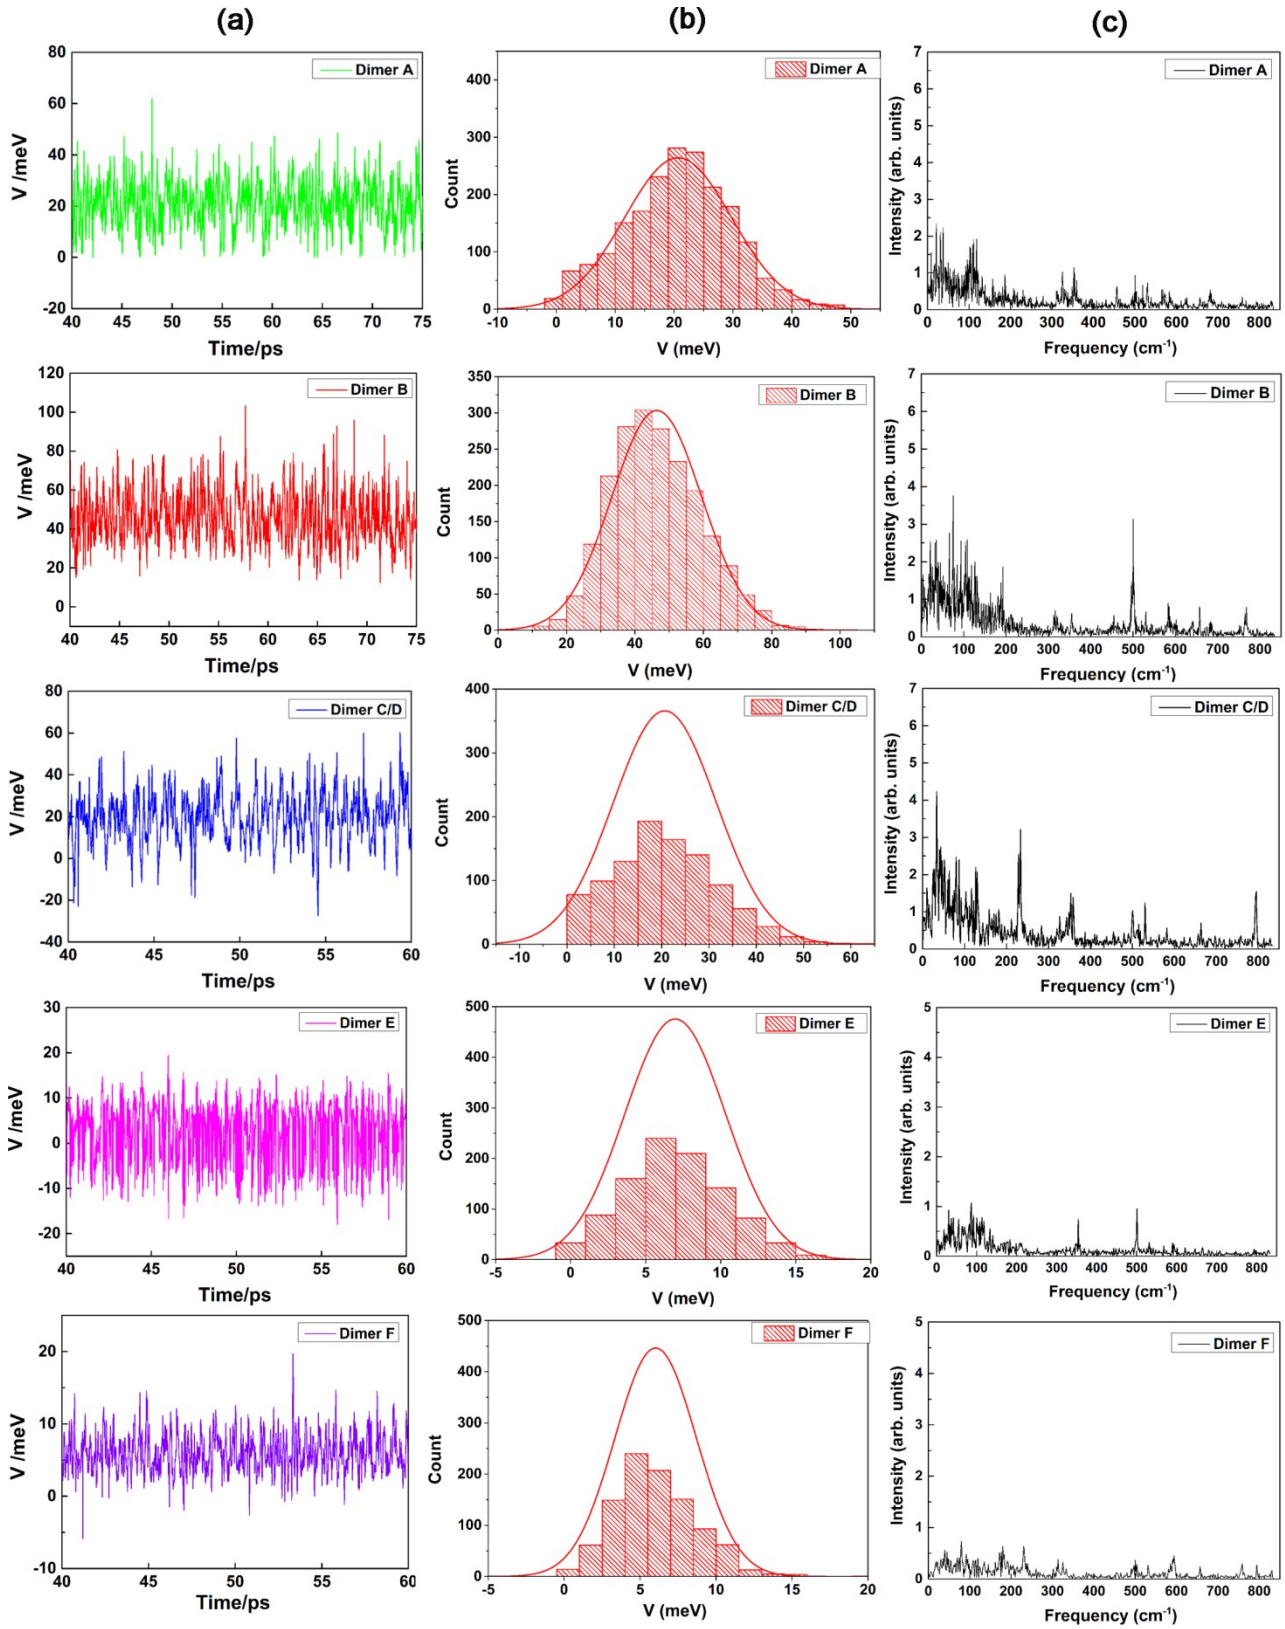

Figure S4. (a) Evolution of transfer integrals with sampling time at 300K, (b) gaussian fitting of the transfer integrals, and (c) the contributions of vibration modes to the transfer integral fluctuation for all the transport pathways in TCNQ crystal.



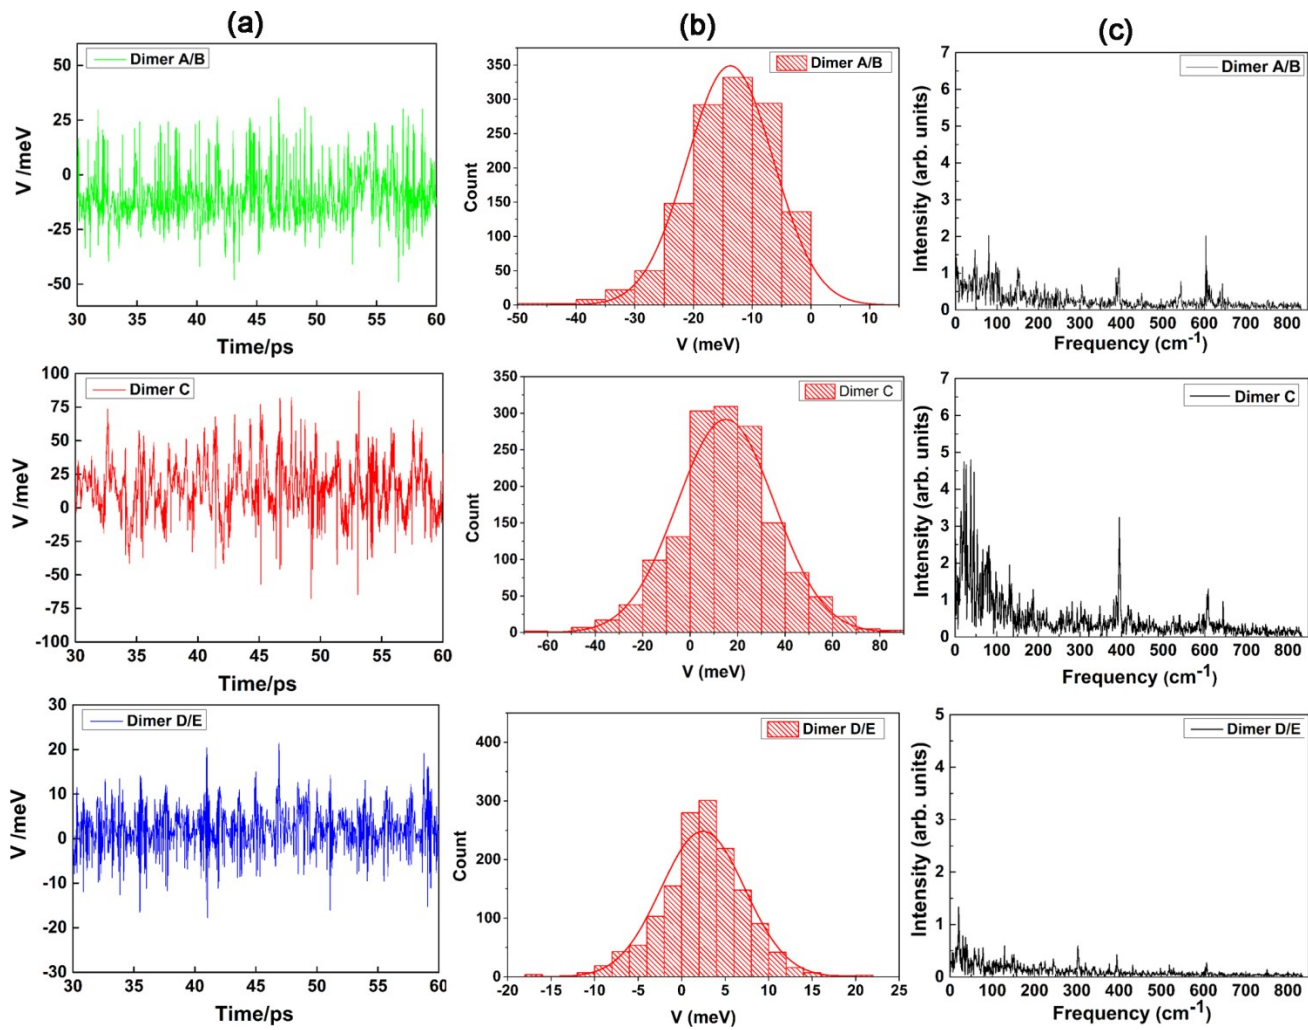

Figure S5. (a) Evolution of transfer integrals with sampling time at 300K, (b) gaussian fitting of the transfer integrals, and (c) the contributions of vibration modes to the transfer integral fluctuation for all the transport pathways in  $F_4$ -TCNQ crystal.

Table S5. The natural charges for TCNQ, F<sub>2</sub>-TCNQ and F<sub>4</sub>-TCNQ molecules.

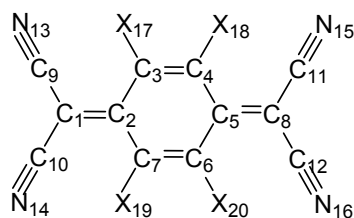

| Number | Atom | TCNQ           | F <sub>2</sub> -TCNQ | F <sub>4</sub> -TCNQ |
|--------|------|----------------|----------------------|----------------------|
|        |      | Natural Charge | Natural Charge       | Natural Charge       |
| 1      | C    | -0.211         | -0.090               | -0.085               |
| 2      | C    | -0.014         | -0.075               | -0.148               |
| 3      | C    | -0.069         | -0.272               | 0.460                |
| 4      | C    | -0.198         | 0.522                | 0.348                |
| 5      | C    | 0.014          | -0.097               | -0.148               |
| 6      | C    | -0.157         | -0.241               | 0.460                |
| 7      | C    | -0.159         | 0.450                | 0.348                |
| 8      | C    | -0.210         | -0.091               | -0.085               |
| 9      | C    | 0.266          | 0.237                | 0.233                |
| 10     | C    | 0.267          | 0.236                | 0.233                |
| 11     | C    | 0.268          | 0.235                | 0.233                |
| 12     | C    | 0.268          | 0.237                | 0.233                |
| 13     | N    | -0.252         | -0.242               | -0.218               |
| 14     | N    | -0.251         | -0.228               | -0.218               |
| 15     | N    | -0.251         | -0.228               | -0.218               |
| 16     | N    | -0.251         | -0.242               | -0.218               |
| 17     | H/F  | 0.229          | 0.258                | -0.300               |
| 18     | H/F  | 0.237          | -0.293               | -0.295               |
| 19     | H/F  | 0.237          | -0.295               | -0.295               |
| 20     | H/F  | 0.237          | 0.258                | -0.300               |



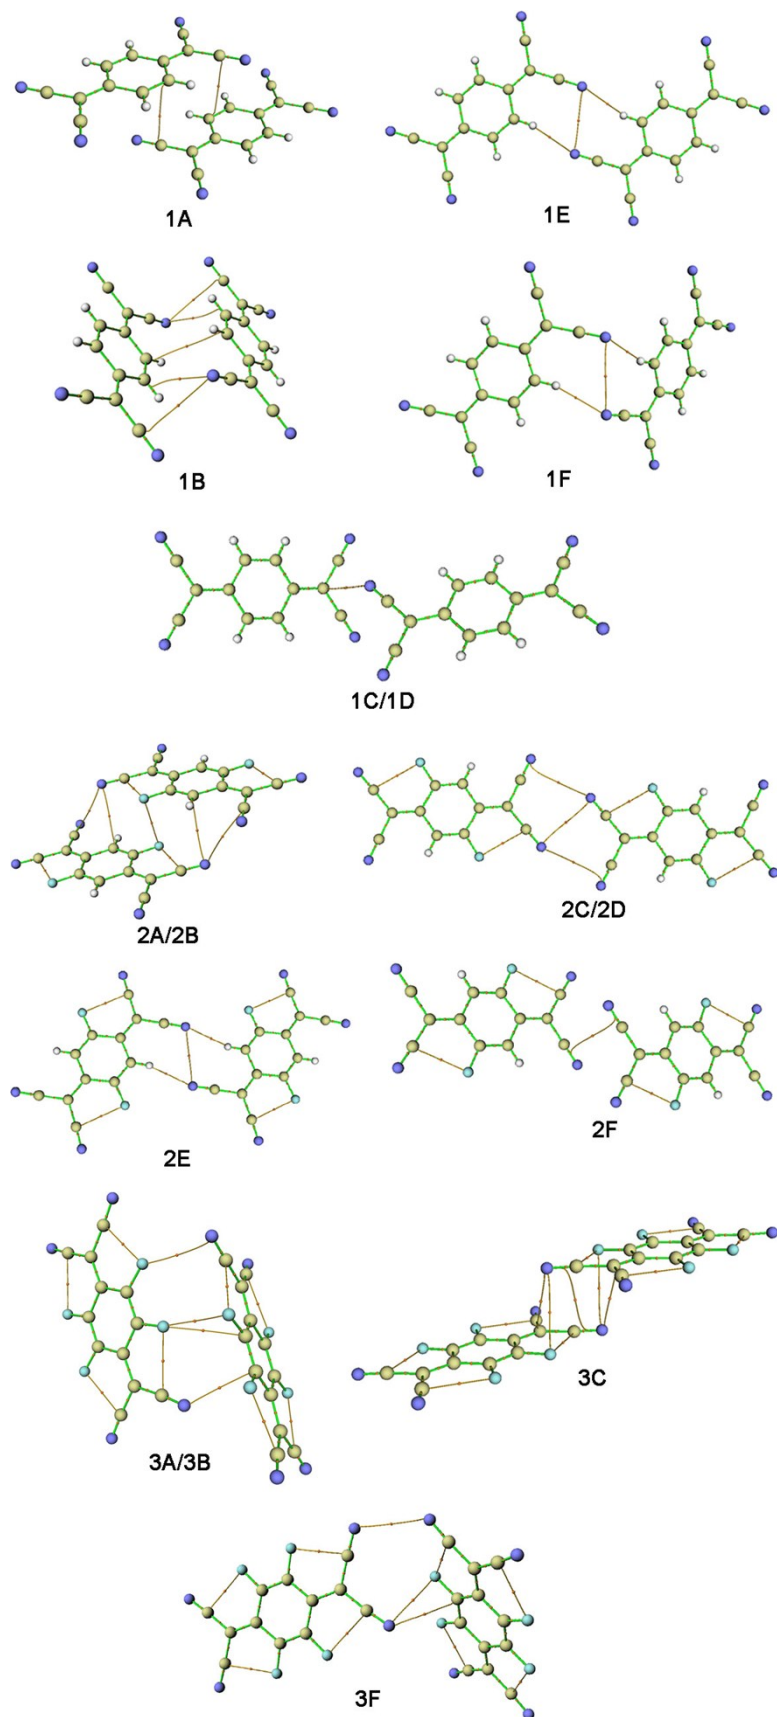

Figure S6 QTAIM electron density maps for various molecular pairs found in the crystals of TCNQ (1A-1F), F<sub>2</sub>-TCNQ (2A-2F), and F<sub>4</sub>-TCNQ (3A-3F).

Table S6. The topological parameters (electron density  $\rho(r)$  and its Laplacian  $\nabla^2\rho(r)$ , kinetic energy density  $G(r)$ , potential energy density  $V(r)$  and energy density  $H(r)$ ) at the bond critical points (BCPs) obtained for intermolecular interactions involved various molecular pairs found in TCNQ crystal. Wave functions are calculated at B3LYP/6-31+G(d,p) level.

| Molecular pairs | Main interactions | Distance/Å | $\rho(r)$ | $\nabla^2\rho(r)$ | $G(r)$ | $V(r)$  | $H(r)$ |
|-----------------|-------------------|------------|-----------|-------------------|--------|---------|--------|
| 1A (5.641 Å)    | C≡N...C           | 3.427      | 0.0051    | 0.0148            | 0.0030 | -0.0023 | 0.0007 |
|                 | C≡N...C           | 3.427      | 0.0051    | 0.0148            | 0.0030 | -0.0023 | 0.0007 |
| 1B (5.641 Å)    | C≡N...C           | 3.405      | 0.0042    | 0.0135            | 0.0027 | -0.0021 | 0.0064 |
|                 | C≡N...C           | 3.436      | 0.0043    | 0.0135            | 0.0027 | -0.0020 | 0.0007 |
|                 | C≡N...C           | 3.405      | 0.0042    | 0.0135            | 0.0027 | -0.0021 | 0.0064 |
|                 | C≡N...C           | 3.436      | 0.0043    | 0.0135            | 0.0027 | -0.0020 | 0.0007 |
| 1C/1D (9.404 Å) | C≡N...C           | 3.153      | 0.0073    | 0.0238            | 0.0049 | -0.0039 | 0.0010 |
| 1E (8.883 Å)    | C≡N...H           | 2.511      | 0.0086    | 0.0296            | 0.0062 | -0.0050 | 0.0012 |
|                 | C≡N...H           | 2.511      | 0.0086    | 0.0296            | 0.0062 | -0.0050 | 0.0012 |
| 1F (8.197 Å)    | C≡N...H           | 2.544      | 0.0079    | 0.0270            | 0.0057 | -0.0046 | 0.0011 |
|                 | C≡N...H           | 2.544      | 0.0079    | 0.0270            | 0.0057 | -0.0046 | 0.0011 |

Table S7. The topological parameters at BCPs between atoms in the intermolecular regions of various molecular pairs found in F<sub>2</sub>-TCNQ crystal.

| Molecular pair  | Mian interactions                        | Distance/Å | $\rho(r)$ | $\nabla^2\rho(r)$ | G(r)   | V(r)    | H(r)   |
|-----------------|------------------------------------------|------------|-----------|-------------------|--------|---------|--------|
| 2A/2B (5.896 Å) | C≡N...C                                  | 3.658      | 0.0025    | 0.0089            | 0.0017 | -0.0012 | 0.0005 |
|                 | C≡N...C                                  | 3.257      | 0.0058    | 0.0179            | 0.0037 | -0.0029 | 0.0008 |
|                 | C≡N...C                                  | 3.257      | 0.0058    | 0.0180            | 0.0037 | -0.0029 | 0.0008 |
|                 | C≡N...C                                  | 3.658      | 0.0026    | 0.0089            | 0.0017 | -0.0012 | 0.0005 |
|                 | F...F                                    | 3.001      | 0.0056    | 0.0306            | 0.0063 | -0.0050 | 0.0013 |
| 2C/2D (9.314 Å) | C≡N...C≡N<br>(dipole-dipole interaction) | 3.275      | 0.0061    | 0.0206            | 0.0040 | -0.0029 | 0.0011 |
|                 |                                          |            |           |                   |        |         |        |
| 2E (8.836 Å)    | C≡N...H                                  | 2.461      | 0.0094    | 0.0323            | 0.0068 | -0.0056 | 0.0012 |
|                 | C≡N...H                                  | 2.461      | 0.0094    | 0.0323            | 0.0068 | -0.0056 | 0.0012 |
| 2F (11.396 Å)   | C≡N...N≡C                                | 3.391      | 0.0046    | 0.0138            | 0.0030 | -0.0025 | 0.0005 |
|                 | C≡N...C≡N<br>(dipole-dipole interaction) | 3.472      | 0.0039    | 0.0123            | 0.0025 | -0.0020 | 0.0005 |
|                 | C≡N...C≡N<br>(dipole-dipole interaction) | 3.472      | 00039     | 0.0123            | 0.0025 | -0.0020 | 0.0005 |

Table S8. The topological parameters at BCPs between atoms in the intermolecular regions of various molecular pairs found in F<sub>4</sub>-TCNQ crystal.

| Molecular pair    | Mian interactions                        | Distance/Å | $\rho(r)$ | $\nabla^2\rho(r)$ | G(r)   | V(r)    | H(r)   |
|-------------------|------------------------------------------|------------|-----------|-------------------|--------|---------|--------|
| 3A/3B<br>(6.145Å) | C≡N···F-C                                | 3.094      | 0.0053    | 0.0223            | 0.0046 | -0.0037 | 0.0009 |
|                   | C≡N···C                                  | 2.937      | 0.0100    | 0.0343            | 0.0071 | -0.0056 | 0.0015 |
|                   | C-F···C                                  | 3.139      | 0.0044    | 0.0222            | 0.0043 | -0.0031 | 0.0012 |
|                   | C-F···F-C                                | 2.972      | 0.0048    | 0.0277            | 0.0057 | -0.0045 | 0.0012 |
| 3C (8.096Å)       | C≡N···C≡N<br>(dipole-dipole interaction) | 3.327      | 0.0056    | 0.0182            | 0.0036 | -0.0027 | 0.0009 |
|                   | C≡N···C                                  | 3.414      | 0.0049    | 0.0152            | 0.0032 | -0.0025 | 0.0007 |
|                   | C≡N···C                                  | 3.414      | 0.0049    | 0.0152            | 0.0032 | -0.0025 | 0.0007 |
|                   | C≡N···F-C<br>(dipole-dipole interaction) | 3.288      | 0.0040    | 0.0174            | 0.0035 | -0.0027 | 0.0008 |
|                   | C≡N···F-C<br>(dipole-dipole interaction) | 3.288      | 0.0040    | 0.0174            | 0.0035 | -0.0027 | 0.0008 |
|                   | C≡N···F-C<br>(dipole-dipole interaction) | 3.288      | 0.0040    | 0.0174            | 0.0035 | -0.0027 | 0.0008 |
| 3F (8.353Å)       | C≡N···F-C<br>(dipole-dipole interaction) | 3.010      | 0.0070    | 0.0290            | 0.0062 | -0.0052 | 0.0010 |
|                   | C≡N···C                                  | 3.132      | 0.0067    | 0.0238            | 0.0048 | -0.0037 | 0.0011 |
|                   | C≡N···C≡N                                | 3.284      | 0.0051    | 0.0159            | 0.0034 | -0.0028 | 0.0006 |

Table S9. The total intermolecular interaction energy and energy decomposition analysis components for TCNQ molecular pairs extracted from its experimentally determined crystal calculated by SAPT(0)/jun-cc-pVDZ method. ( $\Delta E_{\text{SAPT}(0)}$  is the total SAPT(0) interaction energy;  $E_{\text{elect}}$ ,  $E_{\text{exch}}$ ,  $E_{\text{ind}}$ , and  $E_{\text{disp}}$  are the electrostatic, exchange, induction, and dispersion contributions, respectively. All energy data are in kcal/mol. The values in parentheses indicate the centroid distances R.)

| Molecular pairs | $\Delta E_{\text{SAPT}(0)}$ | $E_{\text{elect}}$ | $E_{\text{ind}}$ | $E_{\text{disp}}$ | $E_{\text{exch}}$ |
|-----------------|-----------------------------|--------------------|------------------|-------------------|-------------------|
| 1A (5.641 Å)    | -8.08                       | -2.41              | -1.99            | -10.78            | 7.10              |
| 1B (5.641 Å)    | -5.04                       | -1.08              | -1.64            | -8.31             | 5.99              |
| 1C/1D (9.404 Å) | -4.82                       | -3.81              | -0.80            | -3.55             | 3.34              |
| 1E (8.883 Å)    | -7.77                       | -6.95              | -1.45            | -3.54             | 4.18              |
| 1F (8.197 Å)    | -6.44                       | -5.27              | -1.26            | -3.53             | 3.61              |

Table S10. The total intermolecular interaction energy and energy decomposition analysis components for F<sub>2</sub>-TCNQ molecular pairs extracted from its crystal structure calculated by SAPT(0)/jun-cc-pVDZ method.

| Molecular pairs | $\Delta E_{\text{SAPT}(0)}$ | $E_{\text{elect}}$ | $E_{\text{ind}}$ | $E_{\text{disp}}$ | $E_{\text{exch}}$ |
|-----------------|-----------------------------|--------------------|------------------|-------------------|-------------------|
| 2A/2B (5.896 Å) | -9.04                       | -4.80              | -2.15            | -8.74             | 6.66              |
| 2C/2D (9.314 Å) | -5.73                       | -4.44              | -1.01            | -5.19             | 4.91              |
| 2E (8.836 Å)    | -6.87                       | -6.54              | -1.46            | -3.89             | 5.03              |
| 2F (11.397 Å)   | -1.51                       | -0.93              | -0.39            | -2.96             | 2.77              |

Table S11. The total intermolecular interaction energy and energy decomposition analysis components for F<sub>4</sub>-TCNQ molecular pairs extracted from its crystal structure calculated by SAPT(0)/jun-cc-pVDZ method.

| Molecular pairs | $\Delta E_{\text{SAPT}(0)}$ | $E_{\text{elect}}$ | $E_{\text{ind}}$ | $E_{\text{disp}}$ | $E_{\text{exch}}$ |
|-----------------|-----------------------------|--------------------|------------------|-------------------|-------------------|
| 3A/3B (6.145 Å) | -6.35                       | -3.69              | -2.05            | -7.91             | 7.29              |
| 3C (8.096 Å)    | -10.41                      | -7.22              | -1.88            | -6.85             | 5.54              |
| 3F (8.353 Å)    | -4.69                       | -3.11              | -1.00            | -4.51             | 3.94              |
